# Supplementary material
Source: ML conference proceedings conference paper supplement (https://openaccess.thecvf.com/content/ICCV2021/html/Doukas_HeadGAN_One-Shot_Neural_ICCV_2021_paper.html)
Supplement: Supplementary file 1 [file Doukas_HeadGAN_One-Shot_Neural_ICCV_2021_supplemental.zip]

Archive with 2 entries (2 files):
- HeadGAN-supplementary-material.pdf
- HeadGAN-supplementary-video.mp4
